# Supplementary material
Source: PubMed Central journal article supplement (PMC5928858)
Supplement: jciinsight-3-99405-s001.pdf [file jciinsight-3-99405-s001.pdf]

1 **Supplemental data**

2

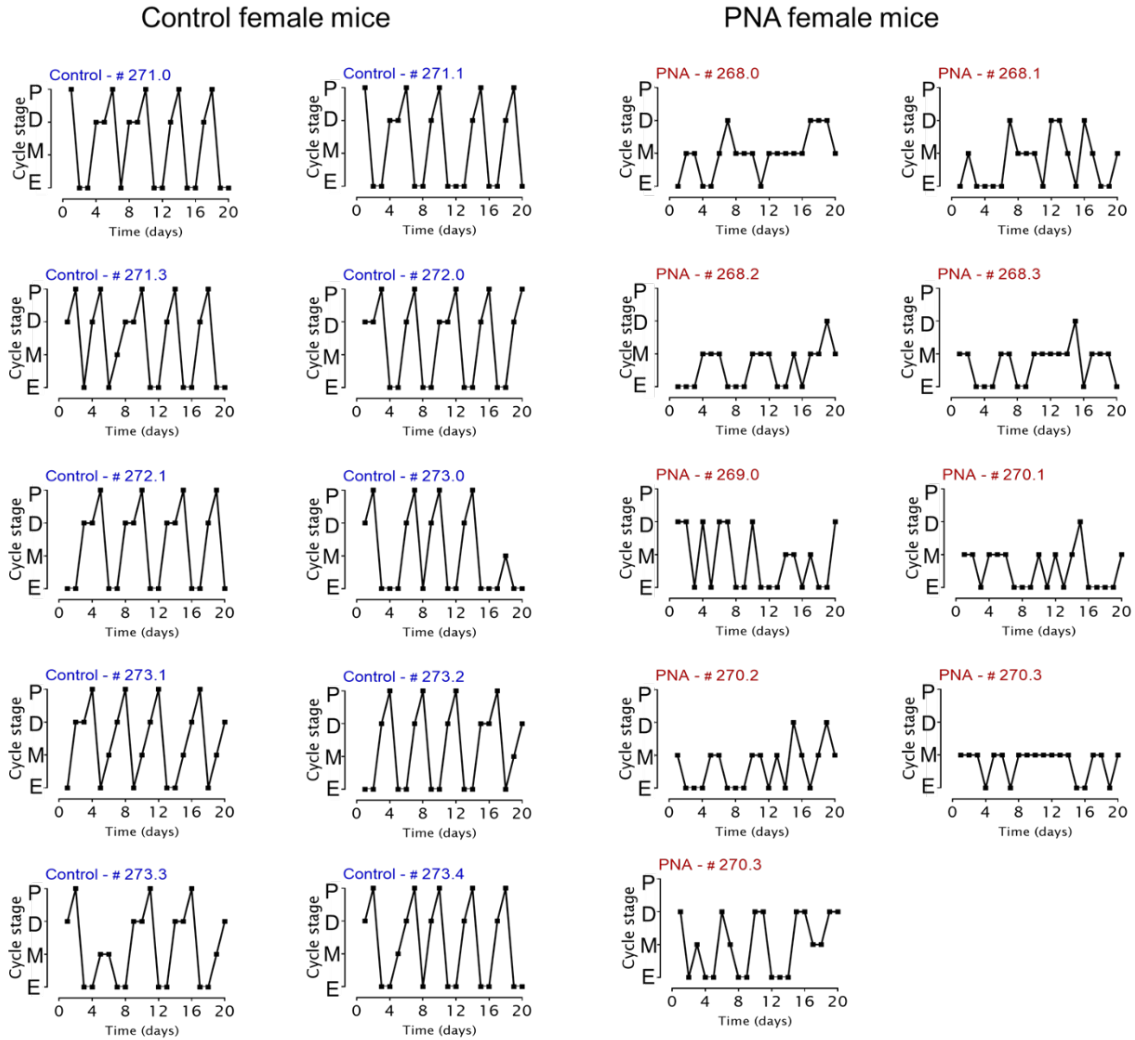

3

4 **Supplemental Figure 1. PNA treatment significantly disrupts reproductive cycles.**

5 Estrous cycles from control (N = 10) and PNA (N = 9) from PND 60 to PND 80. Vaginal

6 smears and cytological evaluation were used to identify the estrous stages proestrus (P),

7 diestrus (D), metestrus (M) and estrus (E). All mice here presented are the same animals

8 used to measure testosterone blood levels from PND 30 to PND 60 as shown in *Figure 1*

9 of this manuscript.

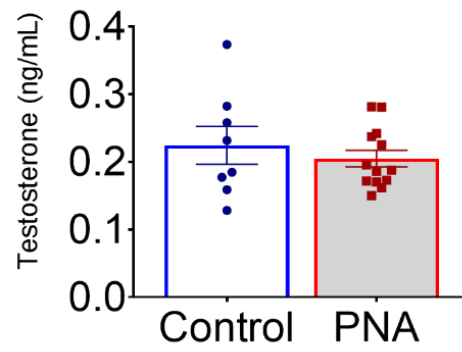

10

11

12 **Supplemental Figure 2. Prepubertal PNA mice have similar testosterone blood**

13 **levels.** Testosterone blood levels from control (N = 8) and PNA (N = 13) mice at PND 25.

14 Two-tailed Student's *t*-test.

15

16

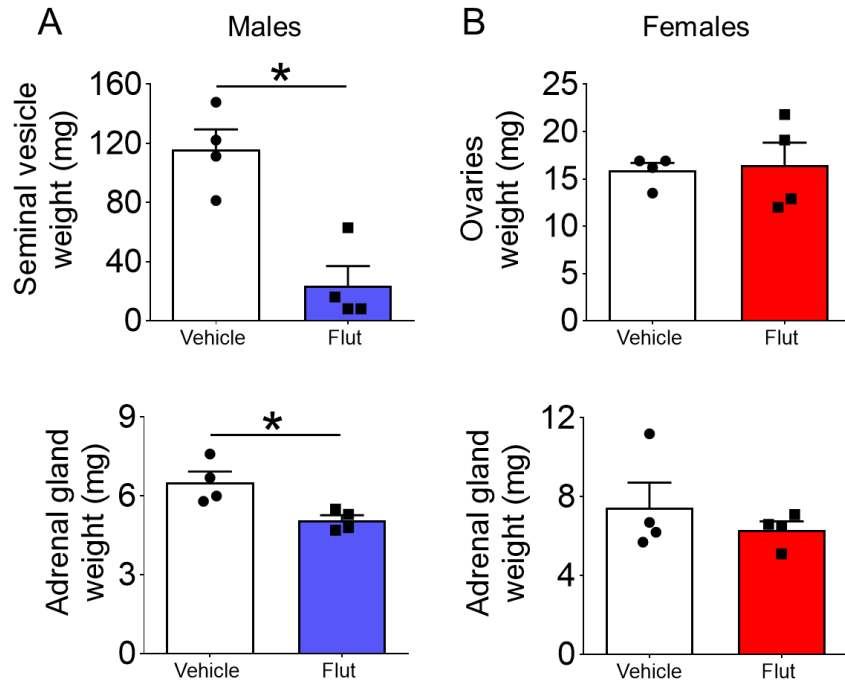

17

18

19 **Supplemental Figure 3. Anti-androgenic effect of flutamide (Flut; 25mg/kg/day)**  
 20 **administration in control male and female mice.** Flut was administered with  
 21 subcutaneous (s.c.) injections daily for 15 days. Antiandrogenic effect at the dose of  
 22 25mg/kg/day was determined by measuring the weight of seminal vesicles and adrenal  
 23 glands from male mice (N = 4), as a positive biological control, and the weight of ovaries  
 24 and adrenal glands from female mice (N = 4). Data are expressed as means  $\pm$  SEM. \* $P$   
 25  $< 0.05$ ; Mann-Whitney  $U$  test.

26

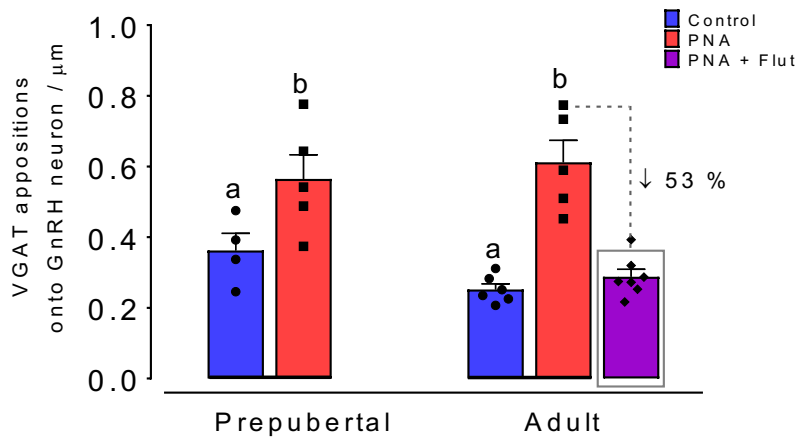

27

28 **Supplemental Figure 4. PNA mice show similar amount of GABA inputs onto GnRH**

29 **neurons across pubertal development.** Total VGAT appositions onto GnRH neuron

30 were compared among prepubertal control (N = 4) and PNA (N = 5) mice, and adult oil-

31 vehicle control (N = 6) and oil-vehicle PNA (N = 5) mice. Histogram values are

32 represented as mean ± SEM. Different letters indicate significant statistical differences

33 with  $P < 0.05$ ; two-way ANOVA with Bonferroni's post hoc test. Graphical representation

34 illustrates the effect of androgen receptor (AR) blockade attenuating GABA inputs onto

35 GnRH neurons (percentage of decrease) in PNA+Flut mice when compared to PNA+oil

36 group.

37

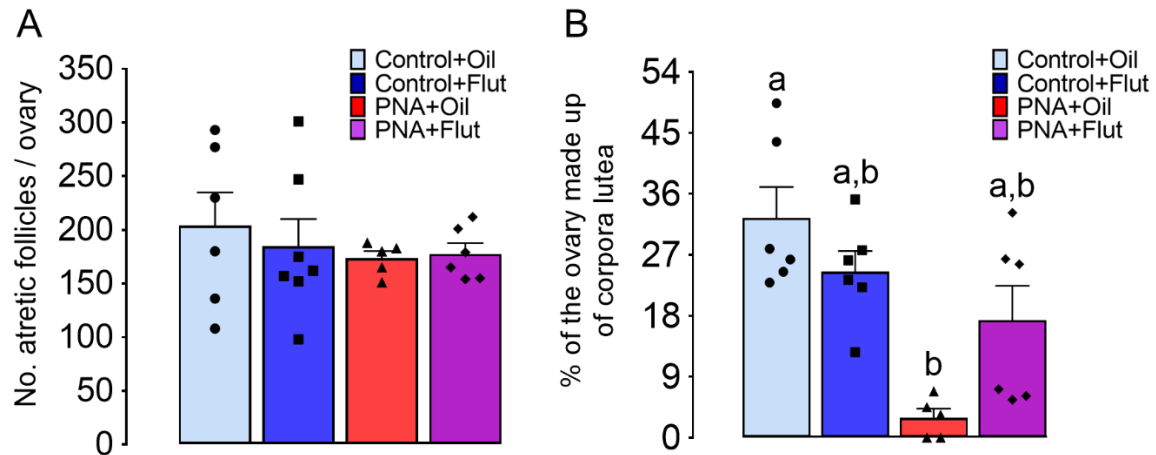

38

39 **Supplemental Figure 5. Androgen receptor (AR) blockade effect on the number of**

40 **atretic follicles and corpora lutea area within the ovary. (A) Total number of atretic**

41 **follicles in adult control and PNA mice receiving daily s.c. injections of an oil-vehicle or**

42 **flutamide (Flut) 25 mg/kg/day from PND 40 to PND 60. (B) Percentage of the ovarian**

43 **follicle area made up of corpora lutea across groups. Different letters indicate significant**

44 **statistical differences with  $P < 0.05$ ; two-way ANOVA followed by Tukey's post hoc test.**

45 **Histograms show mean  $\pm$  SEM data from control+oil (N = 6), control+Flut (N = 7), PNA+oil**

46 **(N = 5) and PNA+Flut (N = 6) groups.**
